# Supplementary material for: Excited-state dynamics of thiophene substituted betaine pyridinium compounds
Source: Royal Society of Chemistry journal article supplement (doi:10.1039/c3cp53614a), 2013-11-08
Supplement: c3cp53614a.pdf [file c3cp53614a.pdf]

***Supporting Information for:***

***Excited-state dynamics of thiophene substituted  
betaine pyridinium compounds***

*Stéphane Aloïse\*, Zuzanna Pawlowska, Olivier Poizat and Guy Buntinx.*

Laboratoire de Spectrochimie Infrarouge et Raman CNRS UMR 8516, Université de  
Lille1 Sciences et Technologies, Université Lille Nord de France, Bat C5, 59655  
Villeneuve d'Ascq Cedex, France.

*Aurélie Perrier, François Maurel*

Université Paris Diderot, Sorbonne Paris Cité, ITODYS, CNRS UMR 7086, 15 rue Jean  
Antoine de Baif, 75205 Paris Cedex 13, France.

*Kazuhiro Ohkawa, Atsushi Kimoto, Jiro Abe*

Department of Chemistry, School of Science and Engineering, Aoyama Gakuin  
University  
5-10-1 Fuchinobe, Chuo-ku, Sagamihara, Kanagawa 252-5258, Japan.

## I. Synthesis of Th<sub>2</sub>SBPa and Th<sub>4</sub>SBPa

All the chemicals were purchased from Tokyo Kasei and Aldrich and used as received, unless otherwise noted. All reactions were monitored by thin-layer chromatography carried out on 0.2 mm E. Merck silica gel plates (60F-254). <sup>1</sup>H-NMR spectra were obtained at 500 MHz with a JMN-ECP500A (JEOL) spectrometer. Chemical shifts are reported in parts per million (ppm) relative to tetramethylsilane.

### 1. Synthesis of Th<sub>2</sub>SBPa.

**Scheme S1.** Synthesis of Th<sub>2</sub>SBPa.

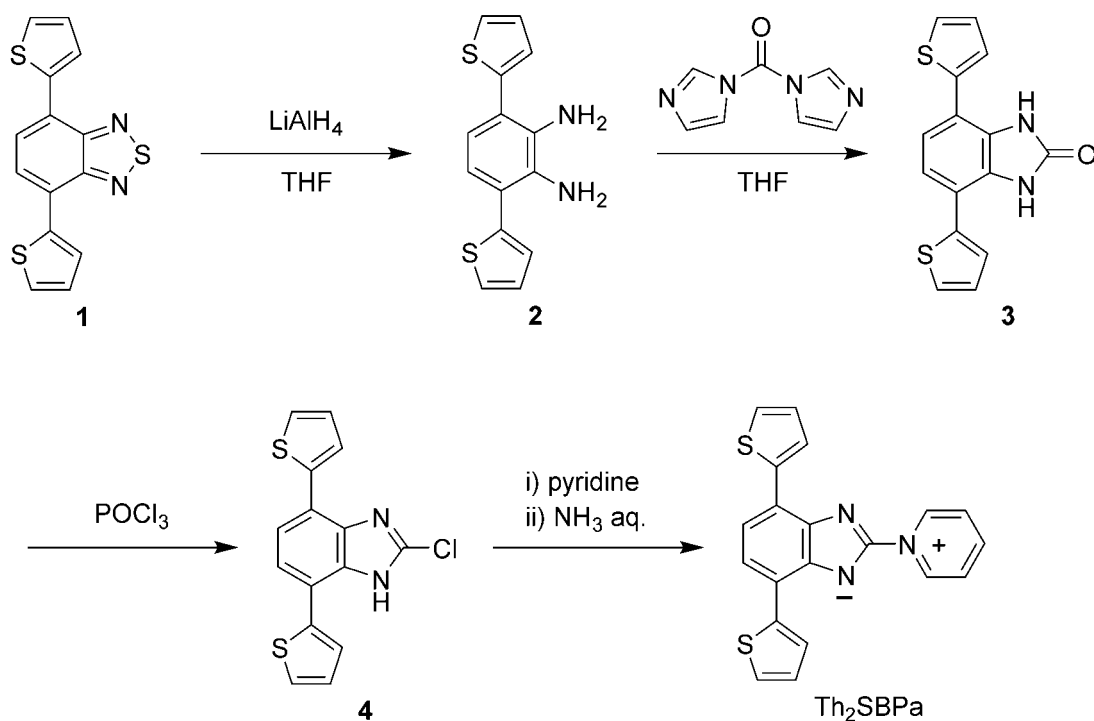

The compound **1** was prepared according to the literature procedures.<sup>1</sup>

**Synthesis of 2 and 3.** To a solution of **1** (270 mg, 0.899 mmol) in THF (12 mL) was slowly added LiAlH<sub>4</sub> (68 mg, 1.8 mmol) at 0 °C under nitrogen. After stirring for 2 h at 0 °C, LiAlH<sub>4</sub> (68 mg, 1.8 mmol) was additionally added. Stirring for 2 h, after the excess LiAlH<sub>4</sub> was quenched, the precipitate was filtered off over Celite. The filtrate was evaporated to dryness to obtain a crude product, which was used without further purification because of its instability. To a solution of the crude product in THF (12 mL) was added 1,1'-carbonyldiimidazole (655 mg, 4.04 mmol) and the solution was heated at 40 °C. After stirring for 5 h, 1,1'-carbonyldiimidazole (328 mg, 2.02 mmol) was additionally added and stirred for overnight. The solvent was evaporated to dryness and the residue was washed with acetonitrile to obtain **3** (263 mg, 0.881 mmol) in 98% yield in 2 steps. <sup>1</sup>H NMR (DMSO-*d*<sub>6</sub>, 500 MHz): δ 10.86 (s, 2H), 7.61 (d, *J* = 5.0 Hz, 2H), 7.50 (d, *J* = 4.0 Hz, 2H), 7.19 (dd, *J* = 4.0 Hz, 2H), 7.15(s, 2H). <sup>13</sup>C NMR (DMSO-*d*<sub>6</sub>, 125 MHz): δ 138.62, 128.27, 126.84, 125.82, 125.65, 120.78, 115.19. FAB-MS: *m/z* 299 [M+H]<sup>+</sup>. Anal. Calcd. for C<sub>15</sub>H<sub>10</sub>N<sub>2</sub>OS<sub>2</sub>: C, 60.38; H, 3.38; N, 9.39. found: C, 60.54; H, 3.49; N, 9.39.

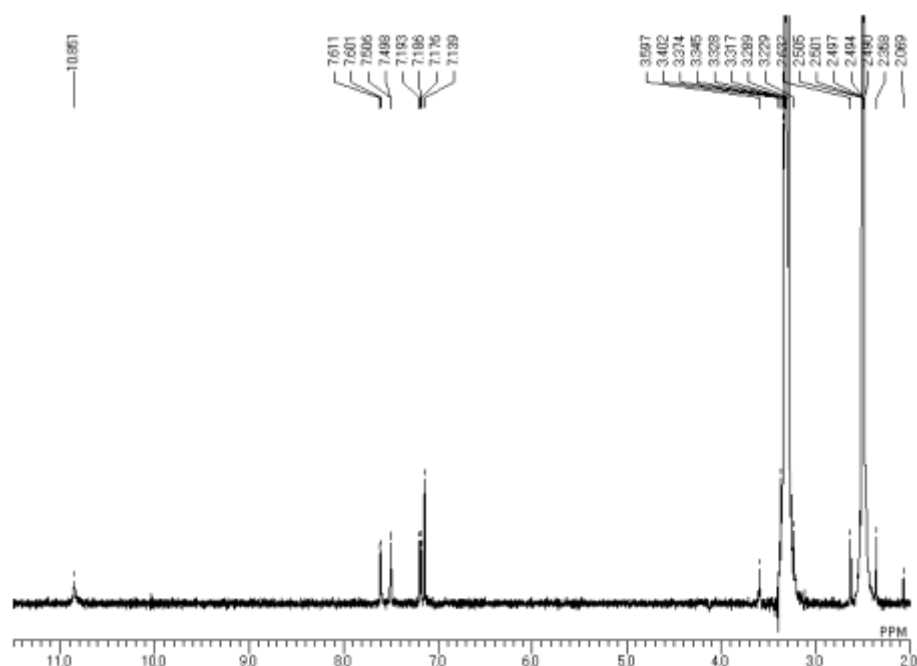

**Figure S1.**  $^1\text{H}$  NMR spectrum of **3** in  $\text{DMSO-}d_6$ .

**Synthesis of 4 and  $\text{Th}_2\text{SBPa}$ .** Compound **3** (256 mg, 0.859 mmol) was suspended in phosphoryl chloride (3 mL) and the solution was refluxed for 3 h. The solvent was evaporated to dryness and the residue was washed with water to obtain crude **4** (162 mg). This mixture was used without further purification because of its instability. The crude compound (150 mg) was dissolved in pyridine (3 mL) and the solution was refluxed for 5 h. The solvent was evaporated to dryness and the residue was dissolved in dichloromethane and the solution was washed with water. The organic layer was dried over  $\text{Na}_2\text{SO}_4$ . After filtration, the solution was evaporated to dryness. The residue was dissolved in methanol (4 mL) and  $\text{NH}_3$  aq. was added to the solution (pH  $\sim 9$ ), which

was allowed to react for overnight. The reaction solution was poured into dichloromethane and washed with water. The organic layer was dried over  $\text{Na}_2\text{SO}_4$ . After filtration, the solution was evaporated to dryness. The residue was washed with methanol and recrystallized from methanol-chloroform to yield  $\text{Th}_2\text{SBPa}$  (18.1 mg, 0.050 mmol) in 6.3% yield in 2 steps.  $^1\text{H}$  NMR ( $\text{DMSO-}d_6$ , 500 MHz):  $\delta$  10.17 (d,  $J$  = 7.0 Hz, 2H), 8.71 (t,  $J$  = 7.0 Hz, 1H), 8.33-8.30 (m, 4H), 7.58 (d,  $J$  = 6.0 Hz, 2H), 7.47 (s, 2H), 7.25 (dd,  $J$  = 3.0 Hz, 2H).  $^{13}\text{C}$  NMR ( $\text{DMSO-}d_6$ , 125 MHz):  $\delta$  145.44, 143.28, 141.89, 139.09, 139.08, 127.82, 127.44, 124.97, 124.48, 122.28, 117.13. FAB-MS:  $m/z$  360  $[\text{M}+\text{H}]^+$ . Anal. Calcd. for  $\text{C}_{20}\text{H}_{13}\text{N}_3\text{S}_2/0.5\text{H}_2\text{O}$ : C, 65.19; H, 3.83; N, 11.40. found: C, 65.14; H, 3.82; N, 11.22.

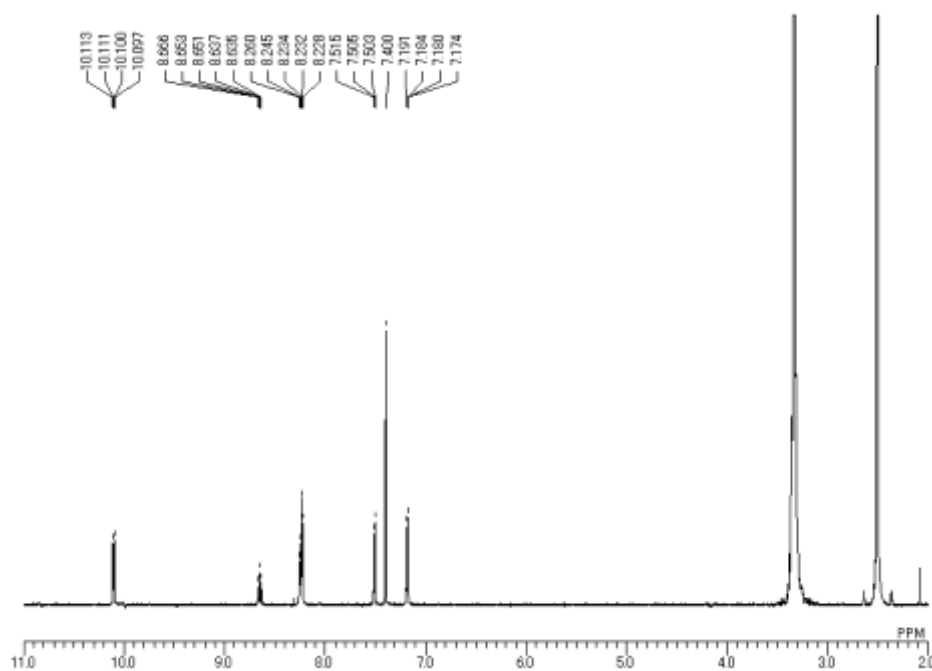

**Figure S2**  $^1\text{H}$  NMR spectrum of  $\text{Th}_2\text{SBPa}$  in  $\text{DMSO-}d_6$ .

## 2. Synthesis of Th<sub>4</sub>SBPa.

**Scheme S2.** Synthesis of Th<sub>4</sub>SBPa.

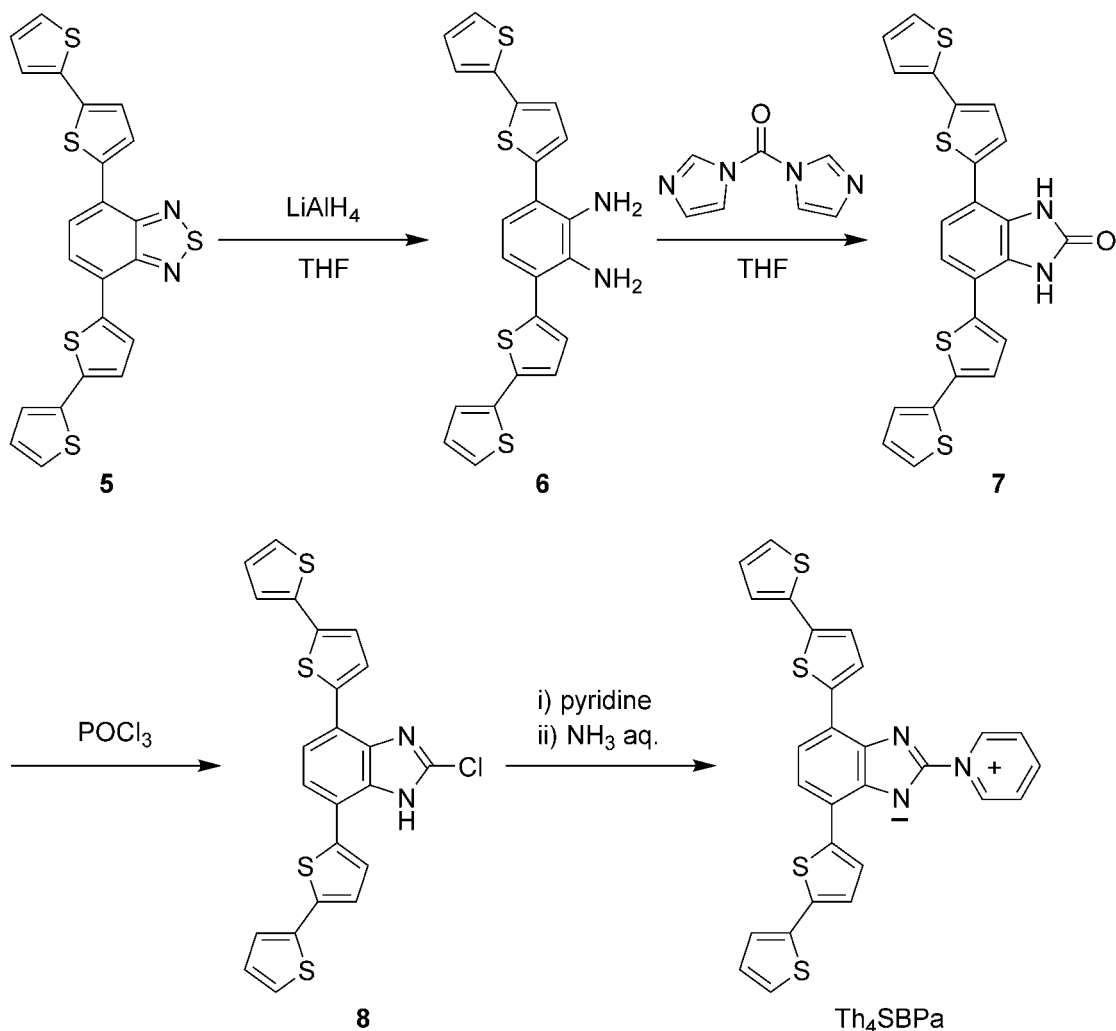

The compound **5** was prepared according to the literature procedures.<sup>2</sup>

**Synthesis of 6 and 7.** To a solution of **5** (241 mg, 0.516 mmol) in THF (120 mL) was slowly added  $\text{LiAlH}_4$  (69 mg, 1.8 mmol) at 0 °C under nitrogen. After stirring for 2 h at room temperature, the reaction mixture was warmed to 60 °C and stirred for overnight. After the excess  $\text{LiAlH}_4$  was quenched, the precipitate was filtered off over Celite. The

filtrate was evaporated to dryness to obtain a crude product, which was used without further purification because of its instability. To a solution of the crude product in THF (80 mL) was added 1,1'-carbonyldiimidazole and the solution was heated at 40 °C for one week. During the reaction, 1,1'-carbonyldiimidazole (1.00 g, 6.19 mmol) was successively added to complete the reaction. The solvent was evaporated to dryness and the residue was washed with acetonitrile to obtain **7** (148 mg, 0.320 mmol) in 62% yield in 2 steps.  $^1\text{H}$  NMR ( $\text{DMSO}-d_6$ , 500 MHz):  $\delta$  10.99 (2H, s), 7.55 (2H, dd,  $J = 3.5$ , 1.5 Hz), 7.48 (2H, d,  $J = 5.0$  Hz), 7.40-7.37 (4H, m), 7.18 (2H, s), 7.13 (2H, t,  $J = 4.0$  Hz). The  $^{13}\text{C}$  NMR spectrum could not be measured due to its low solubility.

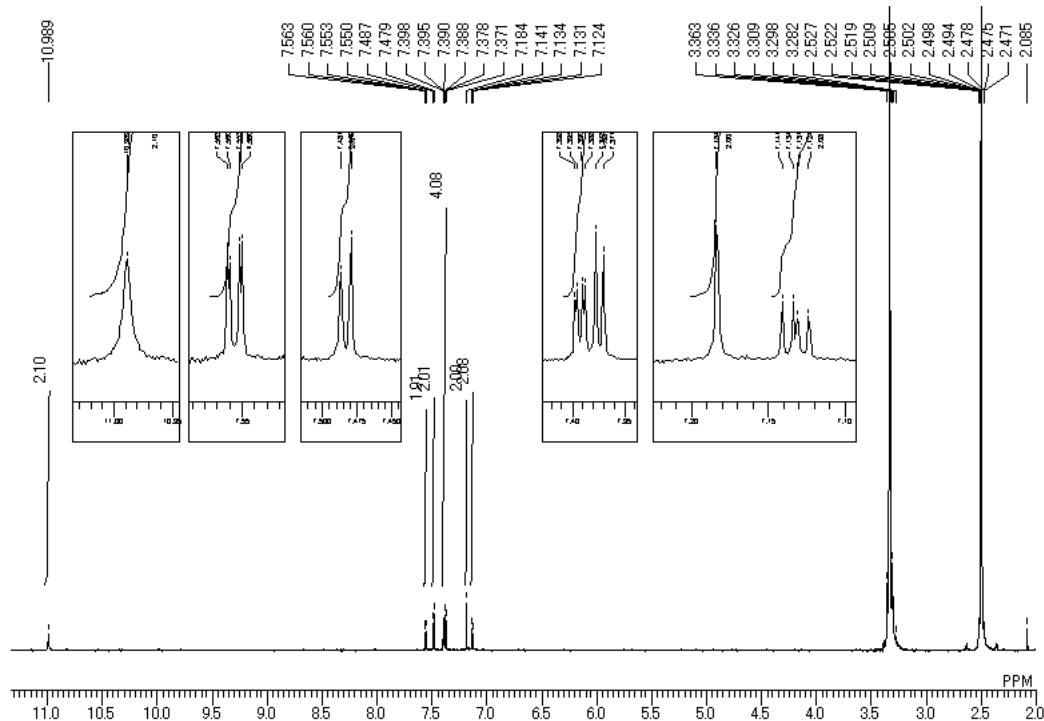

**Figure S3.**  $^1\text{H}$  NMR spectrum of **7** in  $\text{DMSO}-d_6$ .

**Synthesis of 8 and Th<sub>4</sub>SBPa.** Compound **7** (200 mg, 0.432 mmol) was suspended in phosphoryl chloride (3 mL) and the solution was refluxed for 6 h. The solvent was evaporated to dryness and the residue was washed with water to obtain crude **8** (243 mg). This mixture was used without further purification because of its instability. The crude compound (225 mg) was dissolved in pyridine (12.5 mL) and the solution was refluxed for 7 h. The solvent was evaporated to dryness and the residue was dissolved in dichloromethane and the solution was washed with water. The organic layer was dried over Na<sub>2</sub>SO<sub>4</sub>. After filtration, the solution was evaporated to dryness. The residue was dissolved in methanol and THF and NH<sub>3</sub> aq. was added to the solution (pH ~9), which was allowed to react for overnight. The reaction solution was poured into dichloromethane and washed with water. The organic layer was dried over Na<sub>2</sub>SO<sub>4</sub>. After filtration, the solution was evaporated to dryness. The residue was washed with methanol and THF to yield Th<sub>4</sub>SBPa (26.3 mg, 0.050 mmol) in 12% yield in 2 steps. <sup>1</sup>H NMR (DMSO-*d*<sub>6</sub>, 500 MHz): δ 10.11 (d, *J* = 5.5 Hz, 2H), 8.66 (t, *J* = 7.0 Hz, 1H), 8.26 (t, *J* = 7.0 Hz, 2H), 8.14 (d, *J* = 3.5 Hz, 2H), 7.51 (dd, *J* = 3.0, 1.5 Hz, 2H), 7.44 (s, 2H), 7.38 (d, *J* = 3.5 Hz, 2H), 7.34 (d, *J* = 3.5 Hz, 2H), 7.12 (dd, *J* = 3.5, 2.0 Hz, 2H). The <sup>13</sup>C NMR spectrum could not be measured due to its low solubility.



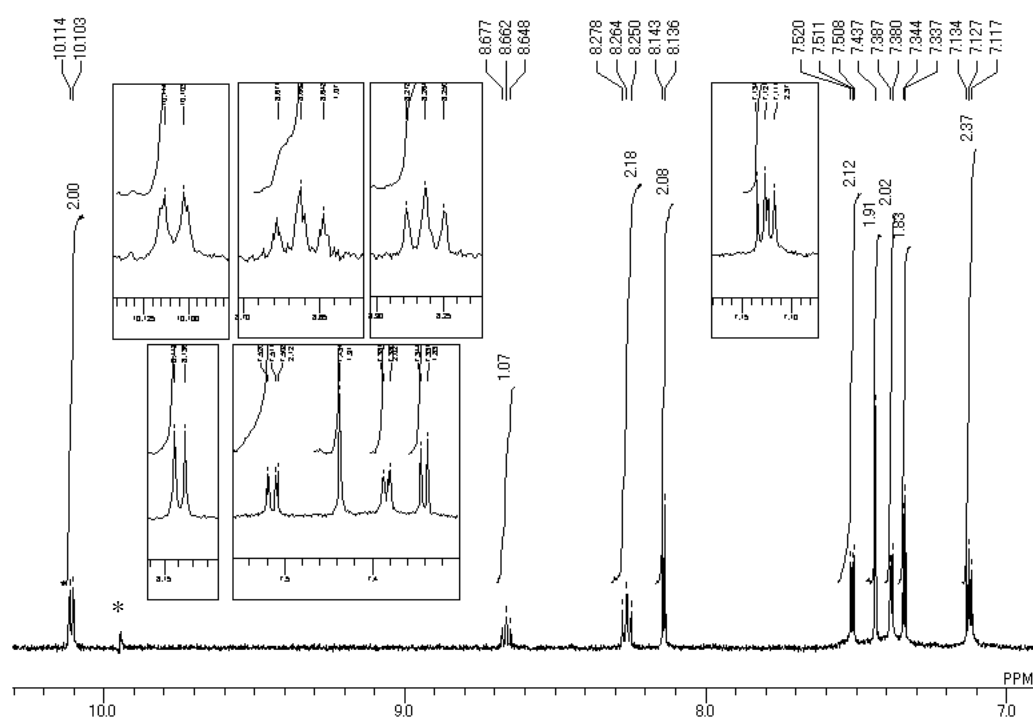

**Figure S4**  $^1\text{H}$  NMR spectrum of  $\text{Th}_4\text{SBPa}$  in  $\text{DMSO-}d_6$ .

(The asterisk means the experimental artifact)

<sup>1</sup> Karikomi, M.; Kitamura, C.; Tanaka, S.; Yamashita, Y. *J. Am. Chem. Soc.* **1995**, *117*, 6791.

<sup>2</sup> van Mullekom, H. A. M.; Vekemans, J. A. J. M.; Meijer, E. W. *Chem. Eur. J.* **1998**, *4*, 1235.

II. TDDFT results

Table S1. PCM-TDDFT calculated wavelength ( $\lambda$ ), oscillator strength (f), and main MO excitations (only contributions > 10% are given) for the four lowest-energy  $S_0 \rightarrow S_n$  transitions of TH<sub>2</sub>SBPa and TH<sub>4</sub>SBPa in toluene, THF, and MeCN.

|                      |                                | Toluene        |                |        | THF            |                |       | MeCN           |                |       |
|----------------------|--------------------------------|----------------|----------------|--------|----------------|----------------|-------|----------------|----------------|-------|
|                      |                                | Excit.         | $\lambda$ (nm) | f      | Excit.         | $\lambda$ (nm) | f     | Excit.         | $\lambda$ (nm) | f     |
| Th <sub>2</sub> SBPa | S <sub>0</sub> →S <sub>1</sub> | H→L (0.693)    | 670            | 0.053  | H→L (0.692)    | 576            | 0.075 | H→L (0.961)    | 543            | 0.088 |
|                      | S <sub>0</sub> →S <sub>2</sub> | H-1→L (0.659)  | 458            | 0.465  | H-1→L (0.668)  | 420            | 0.448 | H-1→L (0.669)  | 405            | 0.436 |
|                      |                                | H→L+1 (-0.118) |                |        |                |                |       |                |                |       |
|                      | S <sub>0</sub> →S <sub>3</sub> | H→L+1 (0.694)  | 401            | 0.074  | H→L+1 (0.658)  | 368            | 0.922 | H→L+1 (0.658)  | 366            | 0.887 |
|                      |                                | H-1→L (0.101)  |                |        |                |                |       |                |                |       |
|                      | S <sub>0</sub> →S <sub>4</sub> | H→L+2 (0.660)  | 371            | 0.974  | H→L+2 (0.695)  | 360            | 0.056 | H→L+2 (0.699)  | 344            | 0.051 |
| Th <sub>4</sub> SBPa | S <sub>0</sub> →S <sub>1</sub> | H→L (0.691)    | 740            | 0.132  | H→L (0.690)    | 644            | 0.206 | H→L (0.688)    | 612            | 0.258 |
|                      | S <sub>0</sub> →S <sub>2</sub> | H-1→L (0.668)  | 484            | 0.1658 | H-1→L (0.201)  | 448            | 1.393 | H→L+1 (0.668)  | 447            | 1.458 |
|                      |                                | H-2→L (0.143)  |                |        | H→L+1 (0.636)  |                |       |                |                |       |
|                      | S <sub>0</sub> →S <sub>3</sub> | H→L+1 (0.667)  | 452            | 1.614  | H-1→L (0.634)  | 400            | 0.280 | H-1→L (0.667)  | 435            | 0.136 |
|                      |                                |                |                |        | H-2→L (0.157)  |                |       | H-2→L (0.164)  |                |       |
|                      |                                |                |                |        | H→L+1 (-0.202) |                |       |                |                |       |
|                      |                                |                |                |        | H-2→L (0.561)  |                |       | H-2→L (0.621)  |                |       |
|                      | S <sub>0</sub> →S <sub>4</sub> | H-1→L (-0.188) | 432            | 0.112  | H-1→L (-0.202) | 383            | 0.152 | H-1→L (-0.195) | 389            | 0.136 |
|                      |                                | H→L+2 (-0.351) |                |        | H→L+2 (0.130)  |                |       | H→L+3 (0.263)  |                |       |
|                      |                                | H→L+3 (0.103)  |                |        | H→L+3 (0.191)  |                |       |                |                |       |

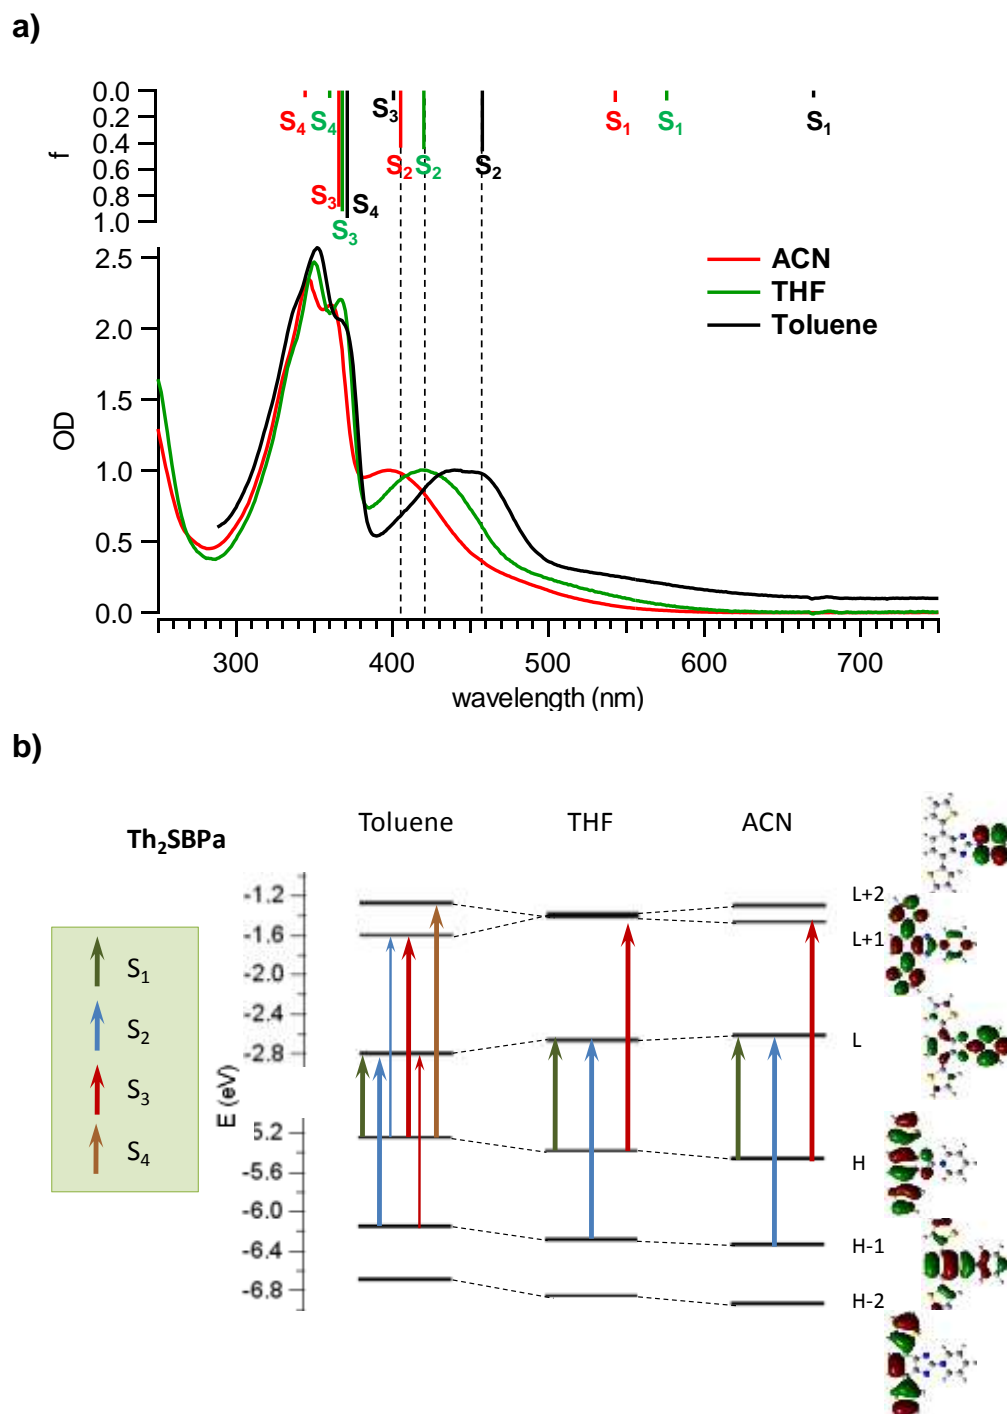

**Figure S.5** Absorption characteristics of  $\text{Th}_2\text{SBPa}$ : a) stationary absorption spectra and PCM-TDDFT transitions in three solvents of different polarity; b) PCM-DFT energy diagram and representation of the orbitals involved in the four lowest energy transitions.

a)

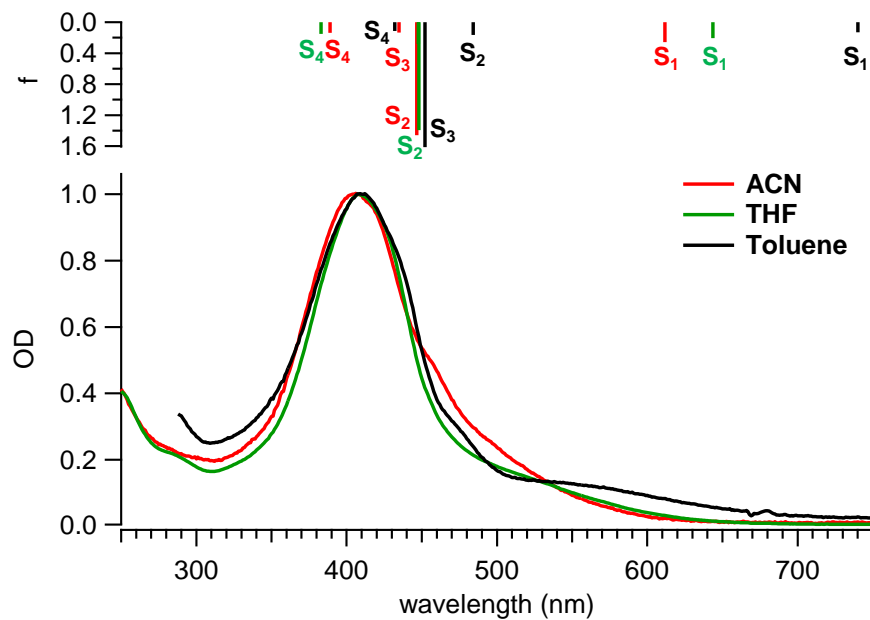

b)

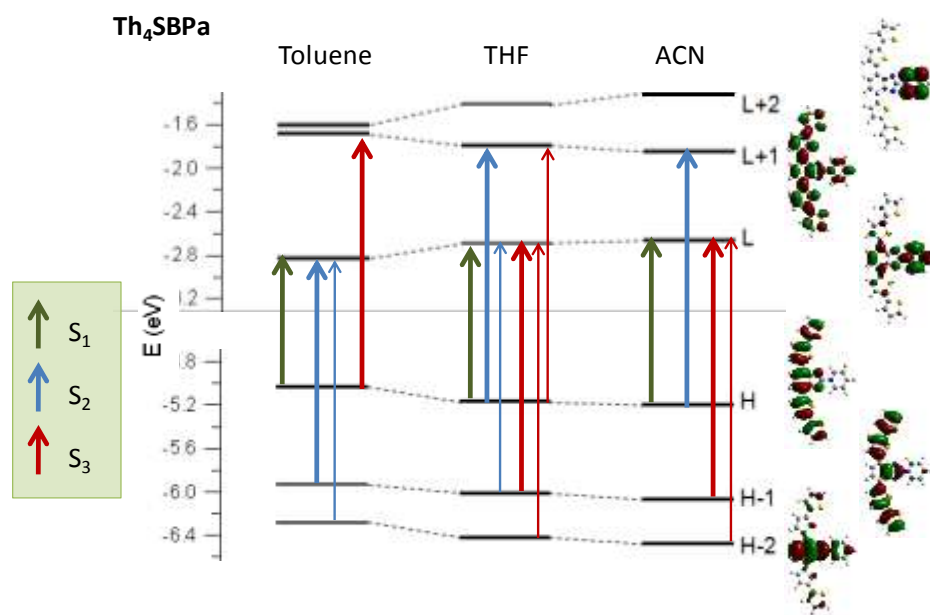

**Figure S.6** Absorption characteristics of Th<sub>4</sub>SBPa: a) stationary absorption spectra and PCM-TDDFT transitions in three solvents of different polarity; b) PCM-DFT energy diagram and representation of the orbitals involved in the four lowest energy transitions.

III. Time resolved spectroscopic results

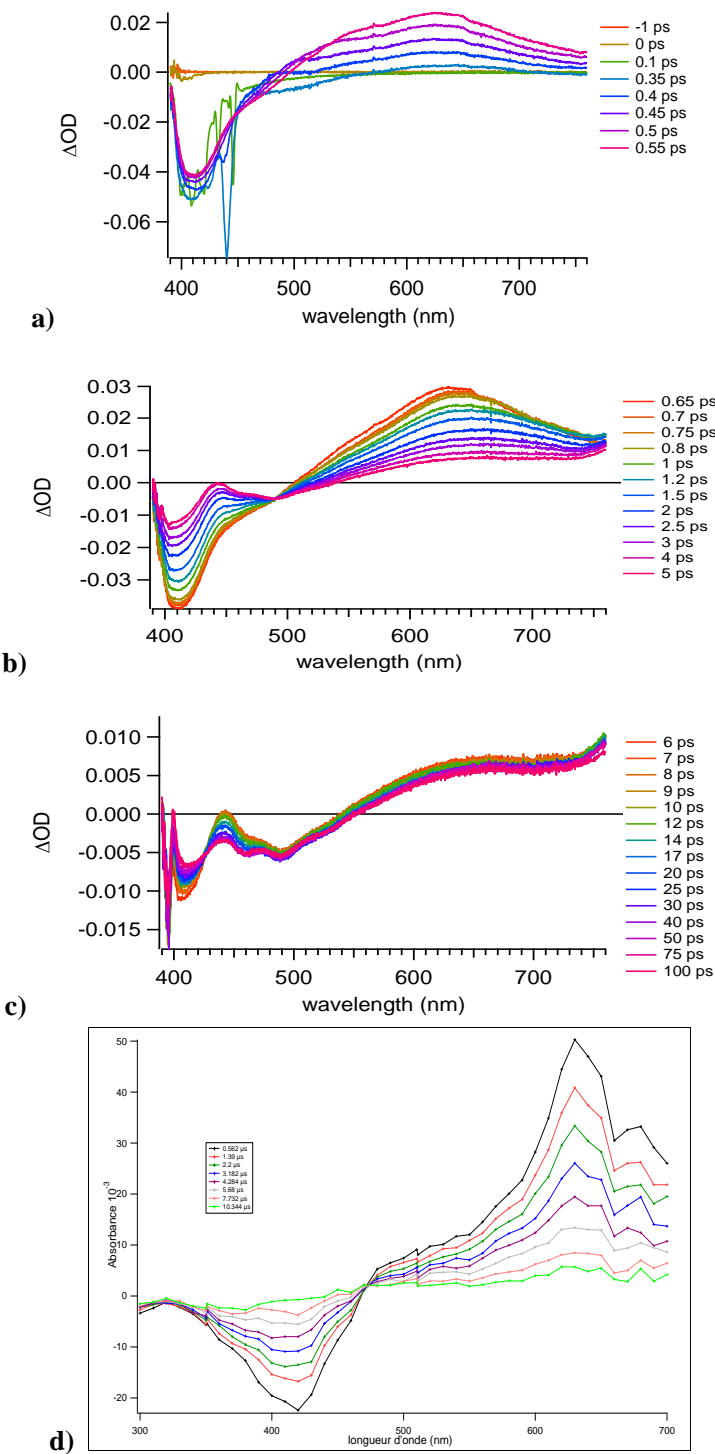

**Figure S7.** Femtosecond transient absorption spectra of Th<sub>4</sub>SBPa in ACN after 390 nm excitation, divided into three temporal windows (a-c); Nanosecond laser flash photolysis of Th<sub>4</sub>SBPa in ACN after excitation with 355 nm (d).

### Solvent effect for TH<sub>2</sub>SBPa transient signal excited at 390 nm.

Similar spectral evolution as in THF shown in fig.2 is found upon 390 nm excitation of TH<sub>2</sub>SBPa in all solvents. The corresponding global fitting characteristic times  $\tau_1$ ,  $\tau_2$ , and  $\tau_3$  are listed in Table 1 where the solvent polarity, viscosity, and solvation time are also given. There is no clear correlation between time  $\tau_2$  and any one of these solvent characteristics due to specific interactions occurring efficiently for betaine pyridinium. The lack of significant influence of the solvent viscosity indicates that the  $S_2(\text{ICT}) \rightarrow S_1(\text{ICT})$  process is probably not accompanied by a large-amplitude molecular distortion such as a twist of the donor and acceptor moieties, as previously concluded for the SBPa molecule. The weak polarity effect can be due to the fact that, both the  $S_1$  and  $S_2$  states having ICT character and differing only by the degree of charge transfer, the  $S_2 \rightarrow S_1$  relaxation might occur without causing important reorganization of the solvent cage. This difference compared with SBPa, for which  $S_2 \rightarrow S_1$  process was controlled by the solvation dynamics may be rationalized by the presence of high steric hindrance thiophene disrupting the homogeneity of the solvation cavity. Consider now the solvent influence on the  $S_1(\text{ICT})$  state lifetime  $\tau_3$ . The  $\tau_3$  values being much larger than the mean solvation time in all solvents, a control by solvation is unlikely. There is a manifest dependency of  $\tau_3$  on the solvent polarity. For instance, in the THF ( $\tau_3 = 7.6$  ps), BuCN ( $\tau_3 = 5.9$  ps), and MeOH ( $\tau_3 = 4.9$  ps) solvents of comparable viscosity but notably different polarity, the  $\tau_3$  value decreases clearly with increasing polarity. This influence of the solvent polarity, much less pronounced for the SBPa molecule (see ref 15), can be reasonably interpreted as a manifestation of the energy gap law. In case of fast IC between two potential energy surfaces, the rate of deactivation from the upper surface to the lower one increases as the energy gap between them decreases. In the case of TH<sub>2</sub>SBPa, the large solvatochromism of the  $S_0 \rightarrow S_1$  absorption band, confirmed by the calculation (Fig. S1), reveals that the energy gap between the two surfaces decreases in polar solvents, in agreement with the decreasing  $\tau_3$  value. In contrast, in the case of SBPa, no significant

influence of the solvent was predicted on the  $S_0 \rightarrow S_1$  transition energy [15], which infers a constant gap in all solvents consistent with the lack of patent effect of the solvent polarity on  $\tau_3$ . Now, if solvents OcCN and THF are compared, the former being twice as polar as the second, a faster IC kinetics is expected by considering only the polarity effect. In reality, the slower IC kinetics observed in OcCN ( $\tau_3 = 13.8$  ps) than in THF ( $\tau_3 = 7.6$  ps) indicates that the solvent viscosity also plays a role in this kinetics.
